# Supplementary material for: Exceptionally fast carbon–carbon bond reductive elimination from gold(III)
Source: Springer Nature journal article supplement (doi:10.1038/nchem.1822), 2013-12-20
Supplement: 41557_2014_BFnchem1822_MOESM10_ESM.mol [file 41557_2014_BFnchem1822_MOESM10_ESM.mol]

  ChemDraw12051308432D

 44 45  0  0  0  0  0  0  0  0999 V2000
   -0.8553    0.7611    0.0000 P   0  0  0  0  0  0  0  0  0  0  0  0
   -0.0286    1.1722    0.0000 N   0  0  0  0  0  0  0  0  0  0  0  0
    0.8553    0.7611    0.0000 P   0  0  0  0  0  0  0  0  0  0  0  0
    0.8553    1.5861    0.0000 C   0  0  0  0  0  0  0  0  0  0  0  0
   -0.8553    1.5861    0.0000 C   0  0  0  0  0  0  0  0  0  0  0  0
    1.6522    0.9746    0.0000 C   0  0  0  0  0  0  0  0  0  0  0  0
   -1.6522    0.9746    0.0000 C   0  0  0  0  0  0  0  0  0  0  0  0
   -1.8657    1.7715    0.0000 C   0  0  0  0  0  0  0  0  0  0  0  0
   -2.6626    1.9851    0.0000 C   0  0  0  0  0  0  0  0  0  0  0  0
   -3.2460    1.4017    0.0000 C   0  0  0  0  0  0  0  0  0  0  0  0
   -3.0325    0.6048    0.0000 C   0  0  0  0  0  0  0  0  0  0  0  0
   -2.2356    0.3913    0.0000 C   0  0  0  0  0  0  0  0  0  0  0  0
   -0.1408    1.9986    0.0000 C   0  0  0  0  0  0  0  0  0  0  0  0
   -0.1408    2.8236    0.0000 C   0  0  0  0  0  0  0  0  0  0  0  0
   -0.8553    3.2361    0.0000 C   0  0  0  0  0  0  0  0  0  0  0  0
   -1.5698    2.8236    0.0000 C   0  0  0  0  0  0  0  0  0  0  0  0
   -1.5698    1.9986    0.0000 C   0  0  0  0  0  0  0  0  0  0  0  0
    1.5698    1.9986    0.0000 C   0  0  0  0  0  0  0  0  0  0  0  0
    1.5698    2.8236    0.0000 C   0  0  0  0  0  0  0  0  0  0  0  0
    0.8553    3.2361    0.0000 C   0  0  0  0  0  0  0  0  0  0  0  0
    0.1408    2.8236    0.0000 C   0  0  0  0  0  0  0  0  0  0  0  0
    0.1408    1.9986    0.0000 C   0  0  0  0  0  0  0  0  0  0  0  0
    2.2356    0.3913    0.0000 C   0  0  0  0  0  0  0  0  0  0  0  0
    3.0325    0.6048    0.0000 C   0  0  0  0  0  0  0  0  0  0  0  0
    3.2460    1.4017    0.0000 C   0  0  0  0  0  0  0  0  0  0  0  0
    2.6626    1.9851    0.0000 C   0  0  0  0  0  0  0  0  0  0  0  0
    1.8657    1.7715    0.0000 C   0  0  0  0  0  0  0  0  0  0  0  0
   -0.0286    0.3472    0.0000 C   0  0  0  0  0  0  0  0  0  0  0  0
   -0.8467   -0.2357    0.0000 Au  0  3  0  0  0  0  0  0  0  0  0  0
    0.8600   -0.2358    0.0000 Au  0  0  0  0  0  0  0  0  0  0  0  0
    0.8631   -1.0334    0.0000 C   0  5  0  0  0  0  0  0  0  0  0  0
    1.5029   -1.3955    0.0000 C   0  0  0  0  0  0  0  0  0  0  0  0
    1.5029   -2.1305    0.0000 C   0  0  0  0  0  0  0  0  0  0  0  0
    0.8631   -2.5035    0.0000 C   0  0  0  0  0  0  0  0  0  0  0  0
    0.2234   -2.1305    0.0000 C   0  0  0  0  0  0  0  0  0  0  0  0
    0.2234   -1.3955    0.0000 C   0  0  0  0  0  0  0  0  0  0  0  0
    0.8631   -3.2361    0.0000 F   0  0  0  0  0  0  0  0  0  0  0  0
   -0.8558   -1.0334    0.0000 C   0  5  0  0  0  0  0  0  0  0  0  0
   -0.2161   -1.3955    0.0000 C   0  0  0  0  0  0  0  0  0  0  0  0
   -0.2161   -2.1305    0.0000 C   0  0  0  0  0  0  0  0  0  0  0  0
   -0.8558   -2.5035    0.0000 C   0  0  0  0  0  0  0  0  0  0  0  0
   -1.4955   -2.1305    0.0000 C   0  0  0  0  0  0  0  0  0  0  0  0
   -1.4955   -1.3955    0.0000 C   0  0  0  0  0  0  0  0  0  0  0  0
   -0.8558   -3.2361    0.0000 F   0  0  0  0  0  0  0  0  0  0  0  0
  1  2  1  0      
  2  3  1  0      
  3  4  1  0      
  1  5  1  0      
  3  6  1  0      
  1  7  1  0      
  7  8  2  0      
  8  9  1  0      
  9 10  2  0      
 10 11  1  0      
 11 12  2  0      
 12  7  1  0      
  5 13  2  0      
 13 14  1  0      
 14 15  2  0      
 15 16  1  0      
 16 17  2  0      
 17  5  1  0      
  4 18  2  0      
 18 19  1  0      
 19 20  2  0      
 20 21  1  0      
 21 22  2  0      
 22  4  1  0      
  6 23  2  0      
 23 24  1  0      
 24 25  2  0      
 25 26  1  0      
 26 27  2  0      
 27  6  1  0      
  2 28  1  0      
 31 32  2  0      
 32 33  1  0      
 33 34  2  0      
 34 35  1  0      
 35 36  2  0      
 36 31  1  0      
 34 37  1  0      
 38 39  2  0      
 39 40  1  0      
 40 41  2  0      
 41 42  1  0      
 42 43  2  0      
 43 38  1  0      
 41 44  1  0      
M  CHG  3  29   1  31  -1  38  -1
M  END
