# Supplementary material for: Exceptionally fast carbon–carbon bond reductive elimination from gold(III)
Source: Springer Nature journal article supplement (doi:10.1038/nchem.1822), 2013-12-20
Supplement: 41557_2014_BFnchem1822_MOESM32_ESM.mol [file 41557_2014_BFnchem1822_MOESM32_ESM.mol]

  ChemDraw12051308432D

 33 32  0  0  0  0  0  0  0  0999 V2000
   -1.4253   -0.2851    0.0000 P   0  0  0  0  0  0  0  0  0  0  0  0
   -0.7109    0.1274    0.0000 C   0  0  0  0  0  0  0  0  0  0  0  0
    0.0012   -0.2837    0.0000 C   0  0  0  0  0  0  0  0  0  0  0  0
    0.7133    0.1274    0.0000 C   0  0  0  0  0  0  0  0  0  0  0  0
    1.4253   -0.2837    0.0000 P   0  0  0  0  0  0  0  0  0  0  0  0
    2.1398    0.1288    0.0000 C   0  0  0  0  0  0  0  0  0  0  0  0
   -2.1398    0.1274    0.0000 C   0  0  0  0  0  0  0  0  0  0  0  0
   -1.2118    0.5118    0.0000 C   0  0  0  0  0  0  0  0  0  0  0  0
    1.2118    0.5132    0.0000 C   0  0  0  0  0  0  0  0  0  0  0  0
   -2.1398    0.9524    0.0000 C   0  0  0  0  0  0  0  0  0  0  0  0
   -2.8543    1.3649    0.0000 C   0  0  0  0  0  0  0  0  0  0  0  0
   -3.5687    0.9524    0.0000 C   0  0  0  0  0  0  0  0  0  0  0  0
   -3.5687    0.1274    0.0000 C   0  0  0  0  0  0  0  0  0  0  0  0
   -2.8543   -0.2851    0.0000 C   0  0  0  0  0  0  0  0  0  0  0  0
   -0.4149    0.7253    0.0000 C   0  0  0  0  0  0  0  0  0  0  0  0
   -0.2014    1.5222    0.0000 C   0  0  0  0  0  0  0  0  0  0  0  0
   -0.7848    2.1056    0.0000 C   0  0  0  0  0  0  0  0  0  0  0  0
   -1.5816    1.8921    0.0000 C   0  0  0  0  0  0  0  0  0  0  0  0
   -1.7952    1.0952    0.0000 C   0  0  0  0  0  0  0  0  0  0  0  0
    1.7952    1.0966    0.0000 C   0  0  0  0  0  0  0  0  0  0  0  0
    1.5816    1.8934    0.0000 C   0  0  0  0  0  0  0  0  0  0  0  0
    0.7848    2.1070    0.0000 C   0  0  0  0  0  0  0  0  0  0  0  0
    0.2014    1.5236    0.0000 C   0  0  0  0  0  0  0  0  0  0  0  0
    0.4149    0.7267    0.0000 C   0  0  0  0  0  0  0  0  0  0  0  0
    2.8543   -0.2837    0.0000 C   0  0  0  0  0  0  0  0  0  0  0  0
    3.5687    0.1288    0.0000 C   0  0  0  0  0  0  0  0  0  0  0  0
    3.5687    0.9538    0.0000 C   0  0  0  0  0  0  0  0  0  0  0  0
    2.8543    1.3663    0.0000 C   0  0  0  0  0  0  0  0  0  0  0  0
    2.1398    0.9538    0.0000 C   0  0  0  0  0  0  0  0  0  0  0  0
   -1.4253   -1.2820    0.0000 Au  0  0  0  0  0  0  0  0  0  0  0  0
    1.4300   -1.2806    0.0000 Au  0  0  0  0  0  0  0  0  0  0  0  0
   -1.4253   -2.1070    0.0000 Cl  0  5  0  0  0  0  0  0  0  0  0  0
    1.4300   -2.1056    0.0000 Cl  0  5  0  0  0  0  0  0  0  0  0  0
  1  2  1  0      
  2  3  1  0      
  3  4  1  0      
  4  5  1  0      
  5  6  1  0      
  1  7  1  0      
  1  8  1  0      
  5  9  1  0      
  7 10  2  0      
 10 11  1  0      
 11 12  2  0      
 12 13  1  0      
 13 14  2  0      
 14  7  1  0      
  8 15  2  0      
 15 16  1  0      
 16 17  2  0      
 17 18  1  0      
 18 19  2  0      
 19  8  1  0      
  9 20  2  0      
 20 21  1  0      
 21 22  2  0      
 22 23  1  0      
 23 24  2  0      
 24  9  1  0      
  6 25  2  0      
 25 26  1  0      
 26 27  2  0      
 27 28  1  0      
 28 29  2  0      
 29  6  1  0      
M  CHG  2  32  -1  33  -1
M  END
